# Supplementary material for: A novel immune-related prognostic signature based on Chemoradiotherapy sensitivity predicts long-term survival in patients with esophageal squamous cell carcinoma
Source: PeerJ journal article supplement (doi:10.7717/peerj.15839), 2023-08-18

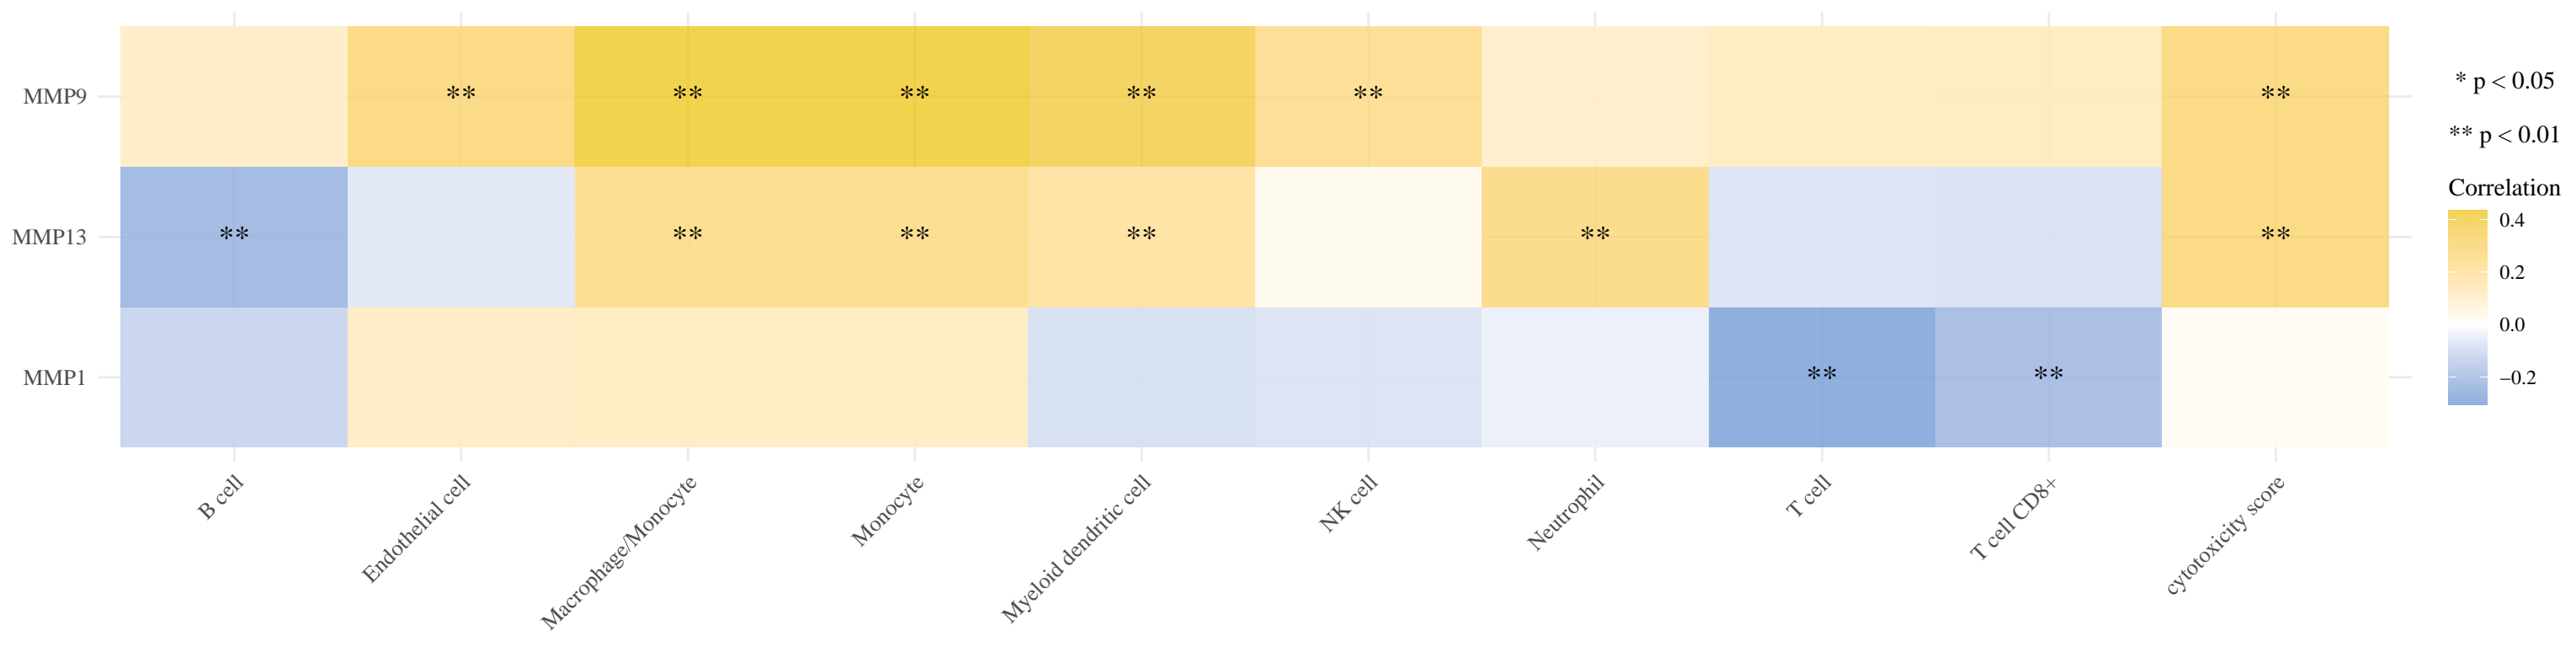

Supplement: Supplement_Figure_S3.pdf [file Supplement_Figure_S3.pdf]
